# Supplementary material
Source: Springer Nature journal article supplement (https://www.springermedizin.de/resource/supplementary/12958_2006_305_MOESM2_ESM.pdf/9567586)
Supplement: MOESM2 [file 9567586]

# A *Spag11t*

actctgtctggaggctcccagcccacactcccagctcagctataagagagcctgcagcag 60  
ctgcccaccaccggggctcttcagtgctgcagctcccctccacagccATGAAACAGAG 120  
Exon 1 M K Q R (4)

ACTCCTTCCTTCCTTTGTCAACCTCCTCCTTGAGCCCTGCTCCTTCCAggtaaagcaga 180  
L L P S F V N L L L A A L L L P (20)  
//  
tctaaatataccttcatttcagcaGGGTCGTCCAGTGCCTCGTCCATTAACCACTTAGTCA 720  
G S S S A S S I N H L V T (13)  
^

CCGAACCCCCAGTTCCCCCAGGACGAATTTCTGCCAAGGAGGAAATGGGTCTGGGT 780  
E P P S S P Q D E F P A Q G G N G S G L (20)

Exon 2 TGTTGCATCACAGAGTGAAACGCTTCCCTCCACGCACCCCCCTTACCATGGTAAGTCAA 840  
L H H R V K R F P P R T P P Y H G K S S (20)

GCATCCAAGATCAAAGTAAGTTCATCCACTTGGGAAATATGGAGCCACATGAcgggagg 900  
I Q D Q S K F I H L G N M E P T \* (16)

tgacagcgtggatgggatgaggtgagcgtcactgtctgtggagacacagtgtagatggtt 960

# B *Spag11c*

actctgtctggaggctcccagcccacactcccagctcagctataagagagcctgcagcag 60  
ctgcccaccaccggggctcttcagtgctgcagctcccctccacagccATGAAACAGAG 120  
Exon 1 M K Q R (4)

ACTCCTTCCTTCCTTTGTCAACCTCCTCCTTGAGCCCTGCTCCTTCCAggtaaagcaga 180  
L L P S F V N L L L A A L L L P (16)  
//  
tctaaatataccttcatttcagcaGGGTCGTCCAGTGCCTCGTCCATTAACCACTTAGTCA 720  
G S S S A S S I N H L V T (13)  
^

CCGAACCCCCAGTTCCCCCAGGACGAATTTCTGCCAAGGAGGAAATGGGTCTGGGT 780  
E P P S S P Q D E F P A Q G G N G S G L (20)

Exon 2 TGTTGCATCACAGAGTGAAACGCTTCCCTCCACGCACCCCCCTTACCATggtaagtcaa 840  
L H H R V K R F P P R T P P Y H (16)  
//

acattcctttttacaGAGCCTGGACCAAATTACCAAATTGTCAACTGCAAGAAAAATGAG 1980  
E P G P N Y Q I V N C K K N E (15)

GGATTCTGTCAAAAATACTGTAATTTTATGGAAACACAAGTGGGCTACTGTTCAAAAAAG 2040  
G F C Q K Y C N F M E T Q V G Y C S.....K...K (20)

Exon 3 AAAGAAGCCTGCTGCTTACATCCCTTCTGAcggggctgatcactgaagttgaagtgacct 2100  
K E A C C L H P F \* (9)

gcacacctgtaaggtctcctggactccggcgatggtctaggtgtgagtgtactagagagg 2160
